# Supplementary material for: An embedded-PVA@Ag nanofiber network for ultra-smooth, high performance transparent conducting electrodes
Source: Royal Society of Chemistry journal article supplement (doi:10.1039/c7tc01002h), 2017-01-01
Supplement: c7tc01002h1.pdf [file c7tc01002h1.pdf]

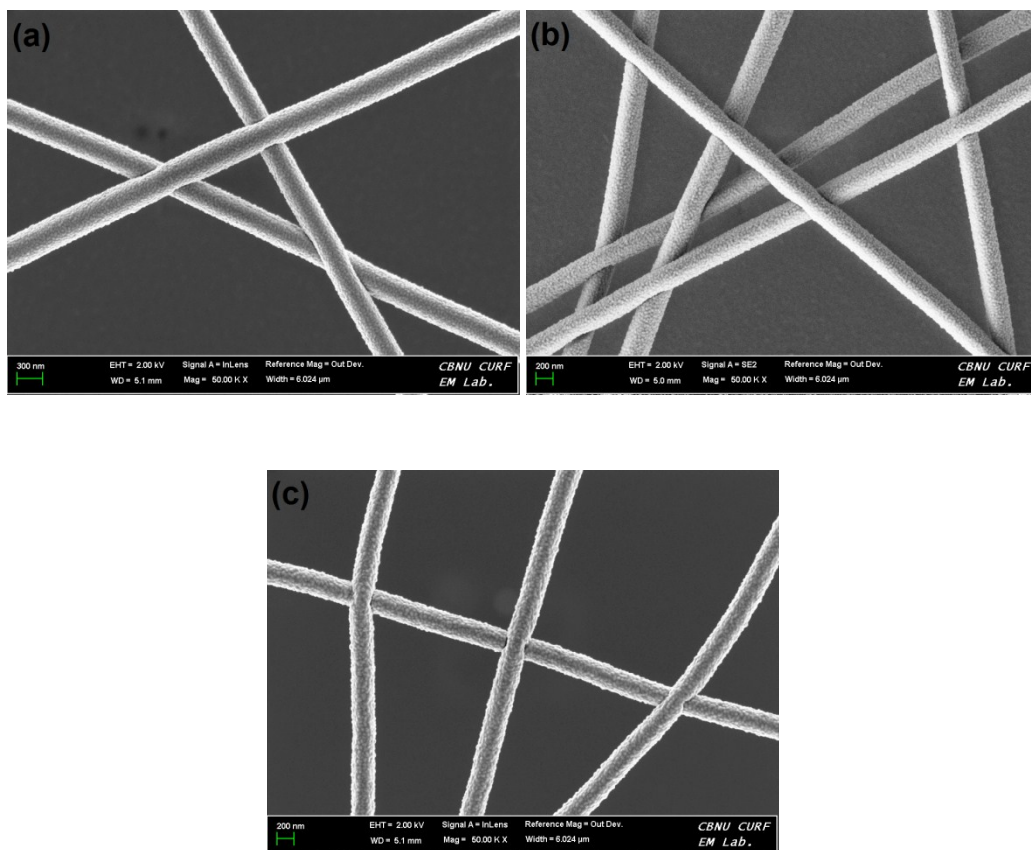

**Fig. S2.** FE-SEM images of surface and junctions between nanofibers (a) PVA@Au NF, (b) PVA@Ag NF and (c) PVA@Cu NF networks

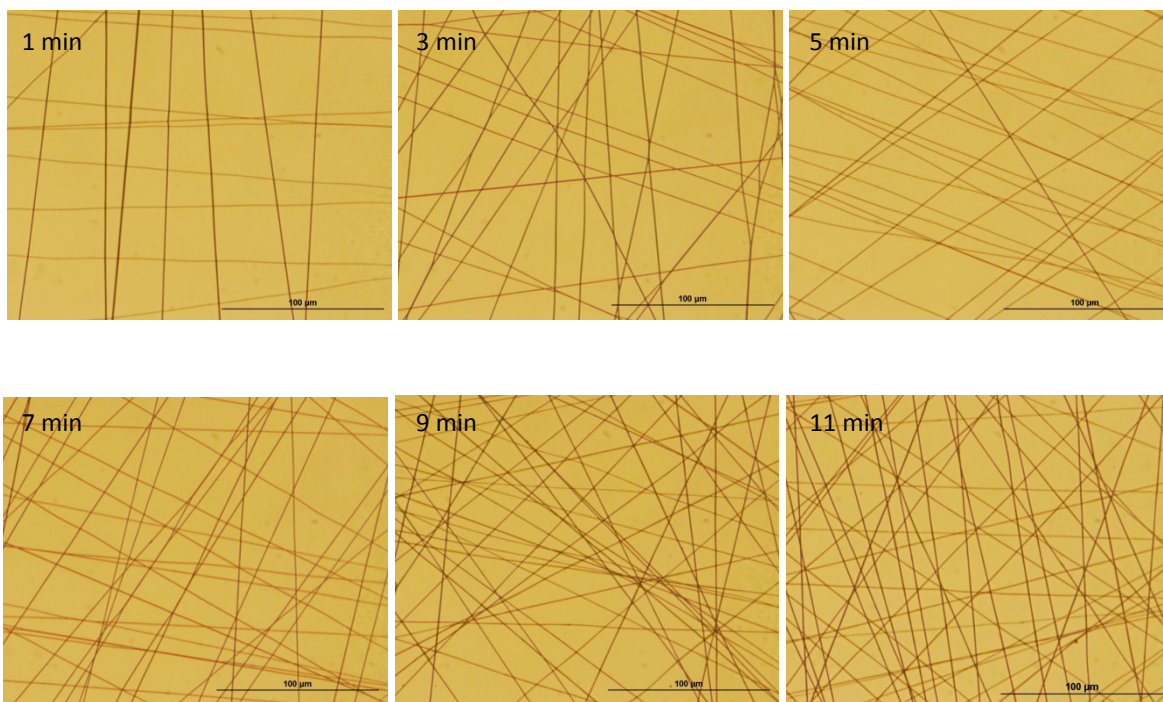

**Fig. S3.** The digital optical images of the PVA@Ag NF networks on glass substrates at different polymer electrospinning times.

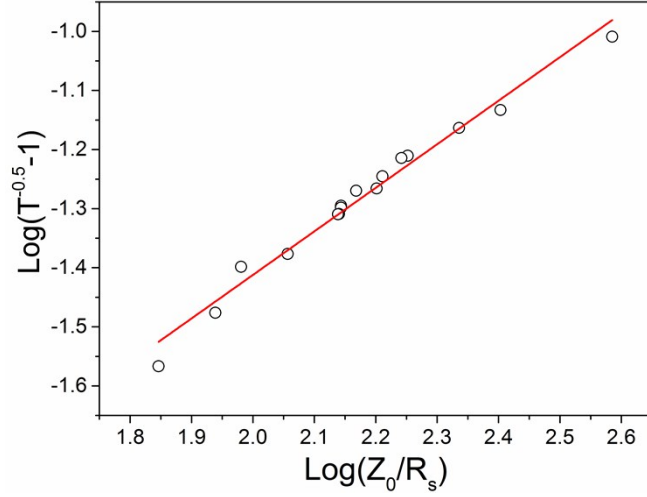

**Fig. S4.** Log-log plot of  $(T^{-0.5} - 1)$  vs.  $\text{Log}(Z_0/R_s)$  for PVA@Ag NF network TCE. (Percolation theory)

The relationship between sheet resistance,  $R_s$ , and transmittance,  $T$ , in a percolation network is described by<sup>1</sup>

$$T = \left[ 1 + \frac{1}{\Pi} \left( \frac{Z_0}{R_s} \right)^{1/(n+1)} \right]^{-2} \quad (1)$$

where  $Z_0$  is the impedance of free space ( $377 \, \Omega$ ),  $n$  is the percolation exponent, and  $\Pi$  is the percolative figure-of-merit.  $\Pi$  follows the relation

$$\Pi = 2 \left[ \frac{\sigma_{op}/\sigma_{DC,B}}{(Z_0 t_{min} \sigma_{op})^n} \right]^{1/(n+1)} \quad (2)$$

Where  $\sigma_{DC}$  is the *dc* conductivity of the film,  $\sigma_{op}$  is proportional to the absorption coefficient ( $\sigma_{op} \sim \alpha/Z_0$ ), and  $t_{min}$  is the critical thickness below which the *dc* conductivity becomes thickness dependent. The percolative regime can be identified as a straight line on a log-log plot of  $(T^{-1/2} - 1)$  versus  $R_s$  (equivalent to a graph of  $T$  vs.  $R_s$ ).

Figure S4 shows the log-log plot of  $(T^{-1/2} - 1)$  vs.  $Z_0/R_s$  for PVA@Ag NF network TCE. Here, the properties of the PVA@Ag NF network TCE were fitted with equation (1), which confirmed that the performance of the PVA@Ag NF network TCE was limited by percolation theory. The percolation parameters of the PVA@Ag NF network TCEs are summarized in Table 1. It is reported that percolation parameters largely depend on the uniformity of the network.<sup>2</sup> The high  $\Pi$  and low  $n$  values observed here may be ascribed to the spatially uniform network. This uniformity was a consequence of the evenly distributed polymer nanofiber template achieved by the electrospinning process.

**Table S1.** Percolation parameters PVA@Ag NF network TCE as compared with literature results.

| Sample         | $n$  | $\Pi$ | Ref.         |
|----------------|------|-------|--------------|
| PVA@Ag NF      | 0.35 | 770   | Present work |
| Ag nanotrough  | 0.10 | 495   | Ref 3        |
| Metal nanowire | 0.81 | 47    | Ref 1        |
| Ag nanowire    | 3.7  | 26    | Ref 2        |

**Table S2.** Properties of the PVA@metal NF network electrodes, compared to other flexible, transparent electrodes from previous research results.

| Reference | Bending radius | Transparency (550nm) | Sheet resistance ( $\Omega/\square$ ) |
|-----------|----------------|----------------------|---------------------------------------|
| PVA@Au NF | 2 mm           | ~90%                 | 6.08                                  |
| PVA@Ag NF | 2 mm           | ~90%                 | 2.56                                  |
| PVA@Cu NF | 2 mm           | ~90%                 | 3.21                                  |
| Ref 4     | 2 mm           | 90%                  | 2                                     |
| Ref 3     | 2.5 mm         | 92%                  | 100                                   |
| Ref 5     | 6 mm           | 90%                  | 25                                    |
| Ref 6     | 4 mm           | 80%                  | 10                                    |
| Ref 7     | -              | 85%                  | 20                                    |

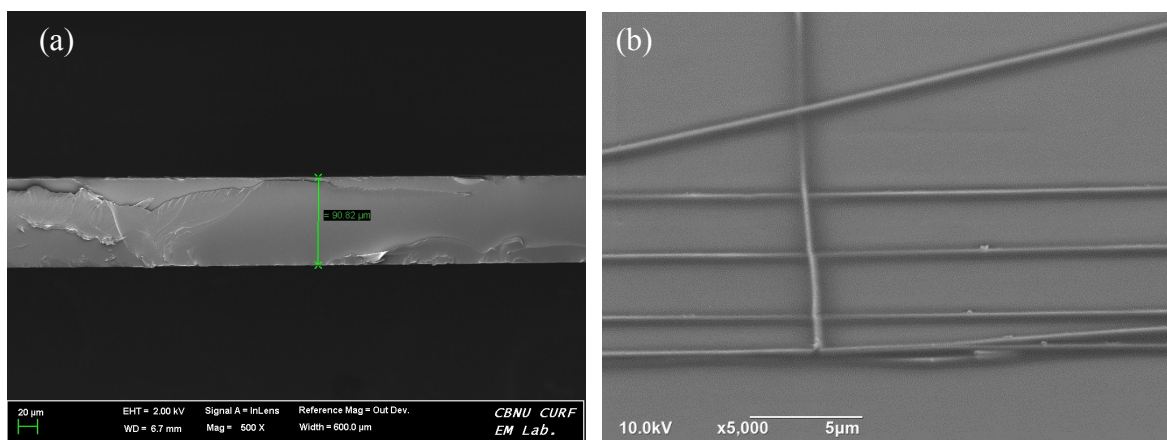

**Fig. S5.** (a) Thickness of a NOA63 film (b) Side-view FE-SEM images of the embedded PVA@Ag NF network NOA 63 TCE.

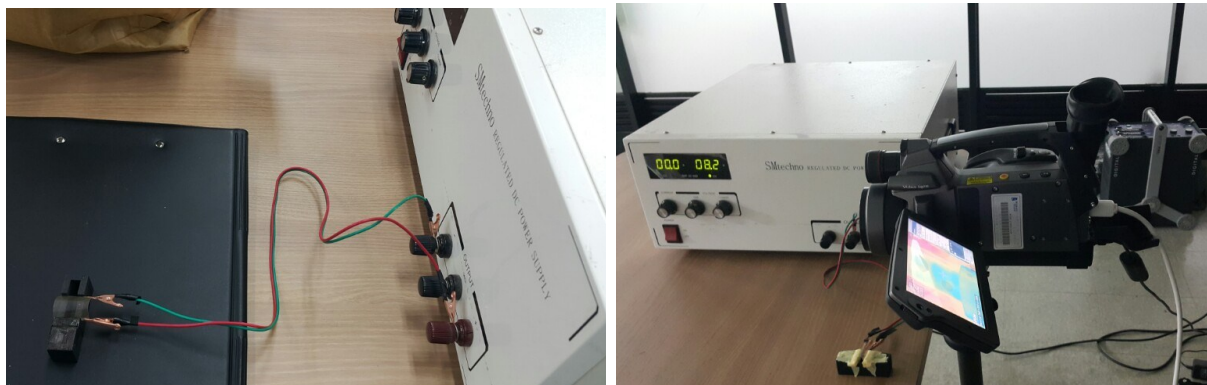

**Fig.S6.** Digital photograph of an experimental set up (infrared thermal imaging camera) for temperature measurement of E-PVA@Ag NF network TCE heater.

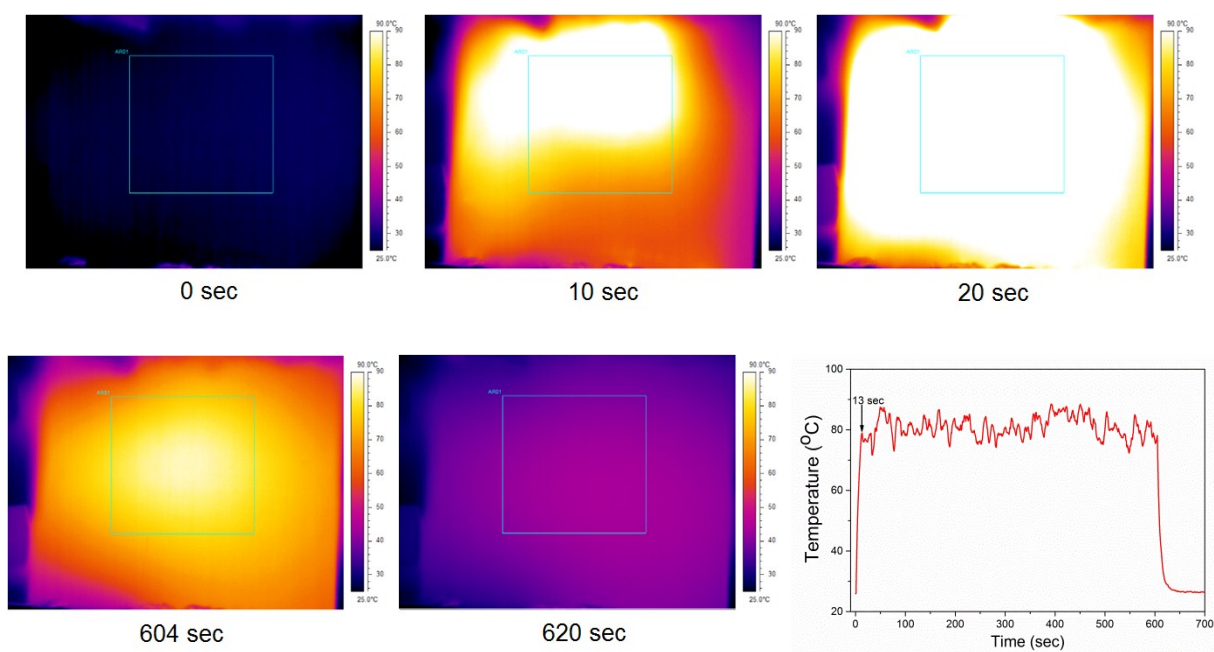

**Fig. S7.** Infrared thermal imaging photograph of E-PVA@Ag NF network TCE temperature distribution at an applied voltage of 4.0 V with time.

## References

- 1 S. De, P. J. King, P. E. Lyons, U. Khan, J. N. Coleman, Size effects and the problem with percolation in nanostructured transparent conductors. *ACS Nano*. 4(12) (2010) 7064-7072.
- 2 V. Scardaci, R. Coull, P. E. Lyons, D. Rickard, J. N. Coleman, Spray Deposition of Highly Transparent, Low-Resistance Networks of Silver Nanowires over Large Areas. *Small*. 7(18) (2011) 2621-2628.
- 3 S. De, T. M. Higgins, P. E. Lyons, E. M. Doherty, P. N. Nirmalraj, W. J. Blau, J. J. Boland, J. N. Coleman, Silver Nanowire Networks as Flexible, Transparent, Conducting Films: Extremely High DC to Optical Conductivity Ratios. *ACS Nano*. 3(7) (2009) 1767-1774.
- 4 H. Wu, D. Kong, Z. Ruan, P.-C. Hsu, S. Wang, Z. Yu, T. J. Carney, L. Hu, S. Fan, Y. Cui, A transparent electrode based on a metal nanotrough network. *Nature nanotechnology*. 8(6) (2013) 421-425.
- 5 H. Wu, L. Hu, M. W. Rowell, D. Kong, J. J. Cha, J. R. McDonough, J. Zhu, Y. Yang, M. D. McGehee, Y. Cui, Electrospun metal nanofiber webs as high-performance transparent electrode. *Nano Lett.* 10(10) 2010 4242-4248.
- 6 J. Y. Lee, S. T. Connor, Y. Cui, P. Peumans, Solution-Processed Metal Nanowire Mesh Transparent Electrodes. *Nano Lett.* 8(2) (2008) 689-692.
- 7 D. S. Leem, A. Edwards, M. Faist, J. Nelson, D. D. C. Bradley, J. C. de Mello, Efficient organic solar cells with solution-processed silver nanowire electrodes. *Advanced Materials* 23(38) (2011) 4371-4375.
